# Supplementary material
Source: HighWire-hosted journal article supplement (https://erj.ersjournals.com/content/53/5/1802220)
Supplement: inline-supplementary-material-1 [file inline-supplementary-material-1.pdf]

## ON-LINE SUPPLEMENTAL MATERIAL

**“Centrally-located lung cancer and risk of occult nodal disease: an objective evaluation of multiple definitions of tumor centrality with a dedicated imaging software.”**

Roberto F. Casal<sup>1</sup>, Boris Sepesi<sup>2</sup>, Ala-Eddin S. Sagar<sup>1</sup>, Juerg Tschirren<sup>3</sup>, Minxing Chen<sup>4</sup>, Liang Li<sup>4</sup>, Jennifer Sunny<sup>5</sup>, Joyce Williams<sup>1</sup>, Horia B. Grosu<sup>1</sup>, George A. Eapen<sup>1</sup>, Carlos A. Jimenez<sup>1</sup>, and David E. Ost<sup>1</sup>.

<sup>1</sup> Department of Pulmonary Medicine, The University of Texas MD Anderson Cancer Center, Houston, Texas, USA.

<sup>2</sup> Department of Cardiothoracic Surgery, The University of Texas MD Anderson Cancer Center, Houston, Texas, USA.

<sup>3</sup> Engineering Department, VIDA Diagnostics, Iowa.

<sup>4</sup> Department of Biostatistics, The University of Texas MD Anderson Cancer Center, Houston, Texas, USA.

<sup>5</sup> Department of Medicine, The University of Texas Health Science Center at Houston, Houston, Texas, USA.

**Corresponding Author Information:** Roberto F. Casal, MD. Associate Professor of Medicine. Department of Pulmonary Medicine. The University of Texas MD Anderson Cancer Center. 1400 Pressler St. Unit 1462. Houston, Texas 77030.

[rfcasal@mdanderson.org](mailto:rfcasal@mdanderson.org)

### VIDA Lung Zones Software (VIDA Diagnostics, Iowa, USA)

The software has the ability to equally divide each lung into thirds (inner, middle, outer) following 2 patterns: “vertical” and “concentric”. The “vertical” pattern consists of straight lines that divide the lung in the sagittal plane, while the “concentric” pattern consists of lines that follow the contour of the lung (Figure 1 of main manuscript). The operator, however, needs to manually select the tumor. In our study, in order to study multiple definitions and to solve the problem of tumors that cross a boundary (a line dividing 2 thirds) raising the question of which third they belong to (most medial one or the third where the center of the tumor is located in), we had the operators chose both the center of the tumor and its most medial aspect.

-For the vertical sub-division we compute the bounding box of each lung (one separate bounding box each for the left and right lung) and then perform the division along the frontal axis into three zones of equal thickness.

-For the concentric sub-division we found the surface of the lungs that is in contact with the chest wall and the diaphragm (i.e., excluding the surfaces lining the mediastinum) and then perform region grow processes that are bound by a percentage of the total lung volume.

**Figure e1: Manual selection of center and medial aspect of tumor**

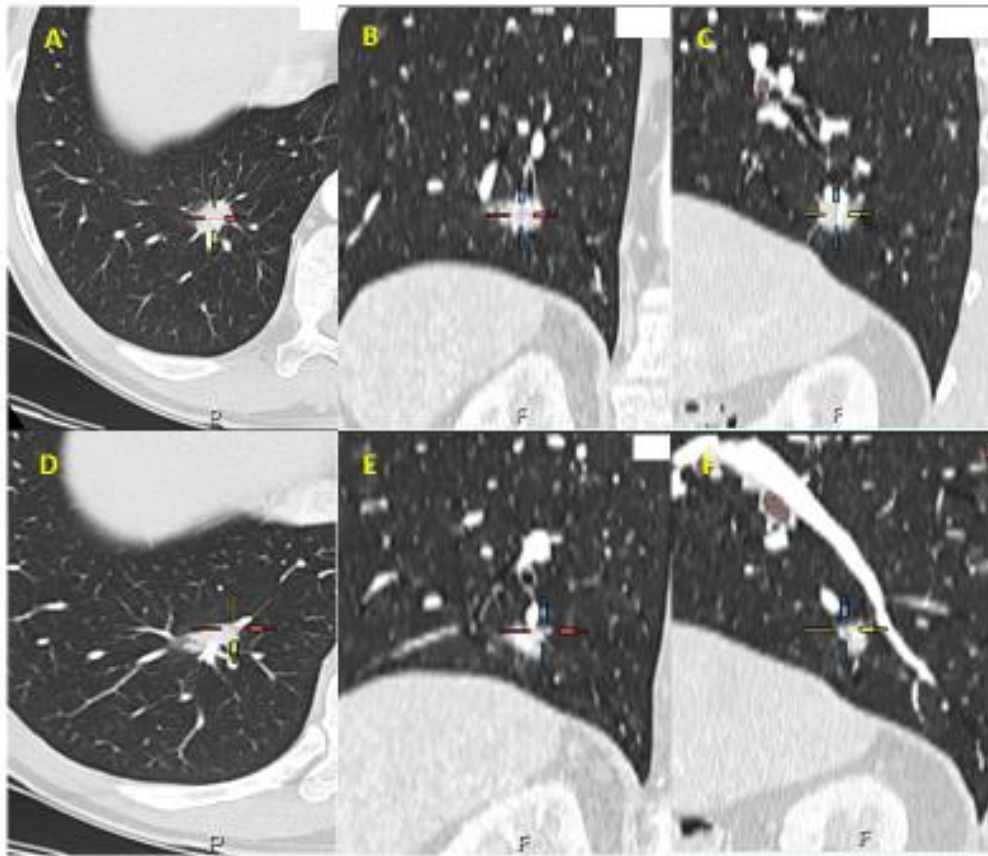

A, B, and C show selection of the center of the tumor simultaneously on axial, coronal, and sagittal axis, respectively. D, E, and F show selection of the most medial aspect of the same tumor (closest to hilum) in axial, coronal and sagittal views, respectively.

Table E1a. All patients. Multivariable Logistic Regression (pN0 vs. pN1/pN2/pN3)

| Predictors                                | OR (95% CI)        | P-value          |
|-------------------------------------------|--------------------|------------------|
| Definition 2 -Concentric Inner 2/3 Medial | 2.22 (1.2, 4.13)   | <b>.012</b>      |
| Tumor histology                           |                    |                  |
| <i>Adenocarcinoma, Ground-Glass</i>       | 1.00 (.11, 9.55)   | .998             |
| <i>Adenocarcinoma, NOT Ground-Glass</i>   | 2.78 (1.18, 6.57)  | <b>.020</b>      |
| <i>Neuroendocrine tumor</i>               | 6.78 (1.65, 27.91) | <b>.008</b>      |
| Tumor location (Upper lobe)               | 1.09 (.58, 2.07)   | .790             |
| Radiographic T (T1b/T1c)                  | 2.95 (.62, 14.09)  | .175             |
| High FDG values (SUV>5)                   | 1.05 (.97, 1.12)   | .212             |
| Tumor differentiation (moderate/poor)     | 9.22 (2.69, 31.59) | <b>&lt;0.001</b> |

*Tumor histology (reference: neither neuroendocrine tumor nor ACA)*

*Tumor location (reference: middle/lower lobe)*

*Radiographic T (reference: T1a)*

*FDG values is a continuous measure*

*Tumor differentiation (reference: well)*

Table E1b. All patients. Multivariable Logistic Regression (pN0 vs. pN1/pN2/pN3)

| Predictors                                 | OR (95% CI)       | P-value     |
|--------------------------------------------|-------------------|-------------|
| Definition 3 - Concentric Inner 1/3 Center | 3.11 (1.02, 9.48) | <b>.047</b> |
| Tumor histology                            |                   |             |
| <i>Adenocarcinoma, Ground-Glass</i>        | 1.02 (.11, 9.62)  | .989        |
| <i>Adenocarcinoma, NOT Ground-Glass</i>    | 2.5 (1.06, 5.94)  | <b>.037</b> |
| <i>Neuroendocrine tumor</i>                | 6.2 (1.45, 26.54) | <b>.014</b> |
| Tumor location (Upper lobe)                | 1.16 (.61, 2.2)   | .658        |
| Radiographic T (T1b/T1c)                   | 3.67 (.74, 18.16) | .111        |
| High FDG values (SUV>5)                    | 1.05 (.98, 1.12)  | .204        |
| Tumor differentiation (moderate/poor)      | 8.6 (2.55, 29.03) | <b>.001</b> |

*Tumor histology (reference: neither neuroendocrine tumor nor ACA)*

*Tumor location (reference: middle/lower lobe)*

*Radiographic T (reference: T1a)*

*FDG values is a continuous measure*

*Tumor differentiation (reference: well)*

Table E2a. Excluding patients without PET-CT. Multivariable Logistic Regression (pN0 vs. pN1/N2/pN3)

| Predictors                                 | OR (95% CI)        | P-value |
|--------------------------------------------|--------------------|---------|
| Definition 3 - Concentric Inner 1/3 Center | 3.81 (1.29, 11.27) | .016    |
| Tumor histology (Adenocarcinoma)           | 1.54 (.76, 3.11)   | .229    |
| Tumor location (Upper lobe)                | 1.03 (.55, 1.93)   | .917    |
| Radiographic T (T1b/T1c)                   | 3.3 (.69, 15.78)   | .135    |
| High FDG values (SUV>5)                    | 1.03 (.96, 1.1)    | .414    |
| Nodule type (Semisolid/Solid)              | 2.69 (.33, 21.65)  | .353    |
| Tumor differentiation (Moderate/poor)      | 5.54 (1.85, 16.64) | .002    |

SS= semisolid; SO= solid

*Tumor histology (reference: others)*

*Tumor location (reference: middle/lower lobe)*

*Radiographic T (reference: T1a)*

*Nodule type (reference: GG)*

*FDG values is a continuous measure*

*Tumor differentiation (reference: well)*

*Same for below tables*

Table E2b. Excluding patients without PET-CT. Multivariable Logistic Regression (pN0 vs. pN1/N2/pN3)

| Predictors                                | OR (95% CI)        | P-value |
|-------------------------------------------|--------------------|---------|
| Definition 2 -Concentric Inner 2/3 Medial | 2.29 (1.24, 4.22)  | .008    |
| Tumor histology (Adenocarcinoma)          | 1.67 (.83, 3.38)   | .150    |
| Tumor location (Upper lobe)               | .97 (.52, 1.81)    | .934    |
| Radiographic T (T1b/T1c)                  | 2.51 (.55, 11.53)  | .237    |
| High FDG values (SUV>5)                   | 1.03 (.96, 1.11)   | .384    |
| Nodule type (Semisolid/Solid)             | 3.04 (.37, 24.95)  | .300    |
| Tumor differentiation (Moderate/poor)     | 5.49 (1.84, 16.43) | .002    |

Table E3a. Excluding patients with carcinoids and GGOs. Univariable Logistic

Regression (pN0/pN1 vs. pN2/pN3)

| Definitions | Tumor location              | N   | n (%)       | OR (95% CI)       | P-value | AUC (95% CI)   |
|-------------|-----------------------------|-----|-------------|-------------------|---------|----------------|
| 1           | Concentric Inner 1/3 Medial | 39  | 5 (12.82%)  | 1.53 (.57, 4.14)  | .401    | .52 (.47, .57) |
| 2           | Concentric Inner 2/3 Medial | 236 | 28 (11.86%) | 1.95 (1.03, 3.71) | .041    | .58 (.51, .66) |
| 3           | Concentric Inner 1/3 Center | 20  | 3 (15%)     | 1.82 (.51, 6.47)  | .355    | .51 (.48, .55) |
| 4           | Concentric Inner 2/3 Center | 170 | 16 (9.41%)  | 1.06 (.56, 2.02)  | .857    | .51 (.43, .58) |
| 5           | Vertical Inner 1/3 Medial   | 99  | 12 (12.12%) | 1.52 (.75, 3.08)  | .242    | .54 (.47, .61) |
| 6           | Vertical Inner 2/3 Medial   | 420 | 41 (9.76%)  | 2.2 (.66, 7.33)   | .199    | .54 (.49, .58) |
| 7           | Vertical Inner 1/3 Center   | 67  | 7 (10.45%)  | 1.2 (.51, 2.81)   | .678    | .51 (.45, .57) |
| 8           | Vertical Inner 2/3 Center   | 368 | 34 (9.24%)  | 1.08 (.52, 2.26)  | .84     | .51 (.44, .57) |
|             | Total                       | 484 | 44 (9.09%)  |                   |         |                |

N=number of patients; n= number of patients with pN2/3

Table E3b. Excluding patients with carcinoids and GGOs. Multivariable Logistic

Regression (pN0/PN1 vs. pN2/pN3) (N=299)

| Predictors                                 | OR (95% CI)       | P-value |
|--------------------------------------------|-------------------|---------|
| Definition 2 - Concentric Inner 2/3 Medial | 1.83 (.73, 4.56)  | .198    |
| Tumor histology (Adenocarcinoma)           | 8.7 (1.11, 68.31) | .040    |
| Tumor location (Upper lobe)                | .48 (.2, 1.19)    | .115    |
| Higher FDG values (SUV>5)                  | 1 (.89, 1.11)     | .958    |
| Tumor differentiation (moderate/poor)      | 7.13 (.89, 57.05) | .064    |

Table E4a. Excluding patients with carcinoids and GGOs. Multivariable Logistic Regression (pN0 vs. pN1/N2/pN3)

| Predictors                                 | OR (95% CI)         | P-value |
|--------------------------------------------|---------------------|---------|
| Definition 3 - Concentric Inner 1/3 Center | 4.9 (1.39, 17.32)   | .014    |
| Tumor histology (Adenocarcinoma)           | 2.53 (1.06, 6.06)   | .037    |
| Tumor location (Upper lobe)                | .99 (.5, 1.96)      | .987    |
| Radiographic T (T1b/T1c)                   | 2.82 (.56, 14.26)   | .209    |
| Higher FDG values                          | 1.04 (.96, 1.12)    | .314    |
| Tumor differentiation (Moderate/poor)      | 17.22 (2.22, 133.6) | .006    |

Table E4a. Excluding patients with carcinoids and GGOs. Multivariable Logistic Regression (pN0 vs. pN1/N2/pN3)

| Predictors                                 | OR (95% CI)         | P-value |
|--------------------------------------------|---------------------|---------|
| Definition 2 - Concentric Inner 2/3 Medial | 2.2 (1.15, 4.2)     | .017    |
| Tumor histology (ACA)                      | 2.8 (1.18, 6.63)    | .019    |
| Tumor location (Upper lobe)                | .92 (.47, 1.8)      | .800    |
| Radiographic T (T1b/T1c)                   | 2 (.43, 9.4)        | .380    |
| Higher FDG values                          | 1.04 (.97, 1.12)    | .264    |
| Tumor differentiation (Moderate/poor)      | 16.09 (2.1, 123.03) | .007    |

Table E5. Excluding patients with carcinoid tumors, GGOs, and without a PET-CT.

Univariable Logistic Regression (pN0/pN1 vs. pN2/pN3)

| Definitions | Tumor location              | N   | n (%)       | OR<br>(95% CI)   | P-value | AUC<br>(95% CI) |
|-------------|-----------------------------|-----|-------------|------------------|---------|-----------------|
| 1           | Concentric Inner 1/3 Medial | 32  | 4 (12.5%)   | 1.5 (.5, 4.55)   | .473    | .52 (.46, .57)  |
| 2           | Concentric Inner 2/3 Medial | 203 | 23 (11.33%) | 1.81 (.89, 3.68) | .102    | .57 (.49, .66)  |
| 3           | Concentric Inner 1/3 Center | 15  | 2 (13.33%)  | 1.59 (.34, 7.33) | .553    | .51 (.47, .55)  |
| 4           | Concentric Inner 2/3 Center | 143 | 13 (9.09%)  | 1.02 (.5, 2.08)  | .962    | .5 (.42, .59)   |
| 5           | Vertical Inner 1/3 Medial   | 77  | 9 (11.69%)  | 1.45 (.65, 3.23) | .361    | .53 (.46, .61)  |
| 6           | Vertical Inner 2/3 Medial   | 348 | 35 (10.06%) | 5.7 (.76, 42.55) | .090    | .56 (.52, .59)  |
| 7           | Vertical Inner 1/3 Center   | 55  | 5 (9.09%)   | 1.01 (.38, 2.73) | .98     | .5 (.44, .56)   |
| 8           | Vertical Inner 2/3 Center   | 301 | 28 (9.3%)   | 1.17 (.51, 2.65) | .713    | .51 (.44, .59)  |
|             | Total                       | 400 | 36 (9%)     |                  |         |                 |

N=number of patients; n= number of patients with pN2/3.



Table E6. Excluding patients with carcinoid tumors, GGOs, and without a PET-CT.

(pN0 vs. pN1/pN2/pN3)

| Definitions | Tumor location              | N   | n (%)       | OR<br>(95% CI)     | P-value | AUC<br>(95% CI) |
|-------------|-----------------------------|-----|-------------|--------------------|---------|-----------------|
| 1           | Concentric Inner 1/3 Medial | 32  | 9 (28.13%)  | 1.79 (.79, 4.05)   | .161    | .52 (.49, .56)  |
| 2           | Concentric Inner 2/3 Medial | 203 | 47 (23.15%) | 1.82 (1.09, 3.05)  | .023    | .57 (.51, .63)  |
| 3           | Concentric Inner 1/3 Center | 15  | 7 (46.67%)  | 4.08 (1.43, 11.63) | .009    | .53 (.5, .57)   |
| 4           | Concentric Inner 2/3 Center | 143 | 32 (22.38%) | 1.43 (.86, 2.39)   | .167    | .54 (.48, .6)   |
| 5           | Vertical Inner 1/3 Medial   | 77  | 19 (24.68%) | 1.56 (.86, 2.83)   | .14     | .54 (.48, .59)  |
| 6           | Vertical Inner 2/3 Medial   | 348 | 69 (19.83%) | 1.9 (.78, 4.62)    | .159    | .53 (.49, .57)  |
| 7           | Vertical Inner 1/3 Center   | 55  | 14 (25.45%) | 1.59 (.82, 3.1)    | .173    | .53 (.48, .58)  |
| 8           | Vertical Inner 2/3 Center   | 301 | 59 (19.6%)  | 1.26 (.69, 2.32)   | .448    | .52 (.47, .57)  |
|             | Total                       | 400 | 75 (18.75%) |                    |         |                 |

N=number of patients; n= number of patients with pN1/N2/N3.

Table E7a. Excluding patients with carcinoid tumors, GGOs, and without PET-CT.

Multivariable Logistic Regression (pN0 vs. pN1/N2/pN3)

| Predictors                                 | OR (95% CI)         | P-value |
|--------------------------------------------|---------------------|---------|
| Definition 3 - Concentric Inner 1/3 Center | 4.9 (1.39, 17.32)   | .014    |
| Tumor histology (Adenocarcinoma)           | 2.53 (1.06, 6.06)   | .037    |
| Tumor location (Upper lobe)                | .99 (.5, 1.96)      | .987    |
| Radiographic T (T1b/T1c)                   | 2.82 (.56, 14.26)   | .209    |
| Higher FDG values                          | 1.04 (.96, 1.12)    | .314    |
| Tumor differentiation (Moderate/poor)      | 17.22 (2.22, 133.6) | .006    |

Table E7b. Excluding patients with carcinoid tumors, GGOs, and without PET-CT.

Multivariable Logistic Regression (pN0 vs. pN1/N2/pN3)

| Predictors                                 | OR (95% CI)         | P-value |
|--------------------------------------------|---------------------|---------|
| Definition 2 - Concentric Inner 2/3 Medial | 2.2 (1.15, 4.2)     | .017    |
| Tumor histology (ACA)                      | 2.8 (1.18, 6.63)    | .019    |
| Tumor location (Upper lobe)                | .92 (.47, 1.8)      | .800    |
| Radiographic T (T1b/T1c)                   | 2 (.43, 9.4)        | .380    |
| Higher FDG values                          | 1.04 (.97, 1.12)    | .264    |
| Tumor differentiation (Moderate/poor)      | 16.09 (2.1, 123.03) | .007    |
